# Supplementary material for: Depletion of VOC in wastewater by vacuum membrane distillation using a dual-layer membrane: mechanism of mass transfer and selectivity
Source: Royal Society of Chemistry journal article supplement (doi:10.1039/c8ew00624e), 2018-11-15
Supplement: c8ew00624e3.pdf [file c8ew00624e3.pdf]

Tentative title:

**Depletion of VOC in wastewater by vacuum membrane distillation using a dual-layer  
membrane: mechanism of mass transfer and selectivity**

Jianhua Zhang<sup>\*,1</sup>, Na Li<sup>2</sup>, Derrick Ng<sup>3</sup>, Ikechukwu A. Ike<sup>1</sup>, Zongli Xie<sup>3</sup>, Stephen Gray<sup>\*,1</sup>

1. Institute for sustainability and Innovation, College of Engineering and Science, Victoria University, Melbourne, Australia
  2. School of Chemical Engineering and Technology, Xi'an Jiaotong University, Xi'an, Shaanxi 710049, P.R. China
  3. Manufacturing, CSIRO, Australia
- \*. Corresponding author

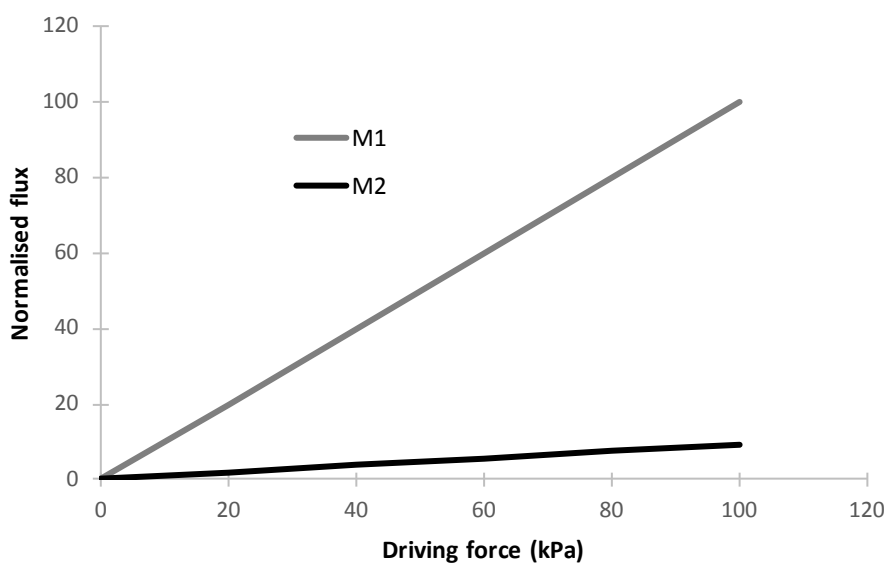

Figure 1S: Normalised flux variation with mass transfer driving force of M1 and M2 membranes
