# Supplementary figures and images for: Depletion of VOC in wastewater by vacuum membrane distillation using a dual-layer membrane: mechanism of mass transfer and selectivity
Source: Royal Society of Chemistry journal article supplement (doi:10.1039/c8ew00624e), 2018-11-15

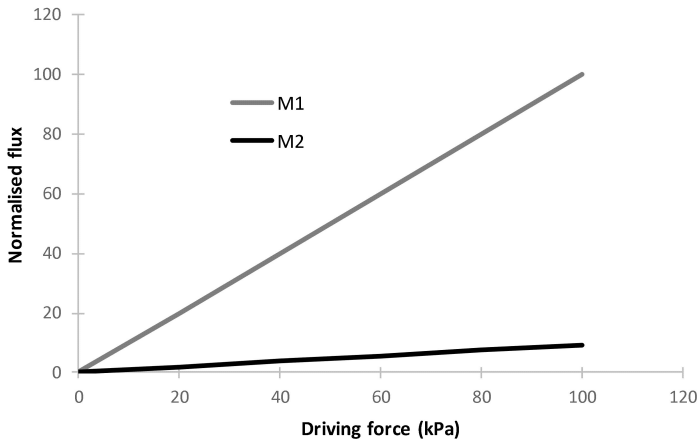

Supplement: c8ew00624e2.pdf [file c8ew00624e2.pdf]
